# Supplementary material for: The Relationship between Pain and Spasticity and Tell-Tale Signs of Pain in Children with Cerebral Palsy
Source: MDPI journal article supplement (doi:10.3390/toxins15020152), 2023-02-13
Supplement: s1 [file s1]

*Article*

# The Relationship Between Pain and Spasticity and Tell-Tale Signs of Pain in Children with Cerebral Palsy

Christian Wong

## Supplement Information.

### The specific oral and written questions in the interview:

What was your child's pain level when examined?

Is your child able to distinguish pain from other sensations in daily life?

Is your child able to distinguish pain from other sensations in general?

What is the level of mild pain in an average week?

How much does the pain affect your child's daily living?

Describe the pain your child is experiencing? (preferably in as much detail as possible)

How long has your child been experiencing this pain?

When does this pain usually occur?

How often does this pain occur, e.g., all the time, every day, weekly, etc.?

What can usually help?

**Table S1.** Notes from the interview with the caregivers and subjects pertaining to pain.

|           | Describe the pain your child is experiencing<br>(preferably in as much detail as possible)     | How long has your child been experiencing this pain?                                                             | When does this pain usually occur?                                  | About how often does this pain occur,<br>e.g. all the time, every day, weekly, etc.? | What can usually help?                                              |
|-----------|------------------------------------------------------------------------------------------------|------------------------------------------------------------------------------------------------------------------|---------------------------------------------------------------------|--------------------------------------------------------------------------------------|---------------------------------------------------------------------|
| Subject 1 | Crying - when is mounted in a standing frame                                                   | Keeps the left leg bent 1 year: does not stretch the leg out.<br>Last 5 months have seemed quiet and less happy. | In the standing frame<br><br>When stretching knee                   |                                                                                      |                                                                     |
| Subject 2 |                                                                                                | Within the last year. Has been increasing with age                                                               | When in a Walker (functional walking aid)<br>When muscle stretching | Every Day                                                                            | Massage                                                             |
| Subject 3 |                                                                                                | After surgery 3 years ago                                                                                        | Activities - mobilization<br>Undressing/dressing                    | All the time, every day                                                              | Position the subject<br>Using a chain duvet                         |
| Subject 4 | Hyperesthesia of the left big toe                                                              | The last few years - especially after hamstring surgery<br>since subject has become more active                  | After active day<br><br>When wearing socks or orthosis              | Very often                                                                           | Massage v. footsole/midfoot                                         |
| Subject 5 | Pain in the right groin.<br><br>Experiencing legs collapsing due to pain, which leads to falls | After surgery 3 years ago                                                                                        | Both by palpation<br><br>and in movement in ROM                     | Every Day                                                                            | Oral pain medicine with paracetamol                                 |
| Subject 6 | Lower leg/calf - tenses up                                                                     | Always                                                                                                           | No triggering factors                                               | Several times a day                                                                  | Oral pain medicine with paracetamol<br>Soothing the child/Hot baths |
| Subject 7 | Pain in the back and hip                                                                       | Always<br>Especially after no walking support 2 years ago                                                        | When he is going to sleep<br><br>When relaxing                      | Every Day                                                                            | Stretching the leg                                                  |
| Subject 8 | Pain in legs in the hip, hamstring, and ankle region                                           | Always                                                                                                           | When standing<br><br>In activity                                    | When active                                                                          | Massage                                                             |
| Subject 9 | Leg pain<br><br>Unilateral                                                                     | Always                                                                                                           | When activating right calf muscles<br><br>When wearing shoes        | Every Day                                                                            | Avoid activities activating right calf                              |

|            |                                                              |                                                 |                                                                          |                  |                                                                           |
|------------|--------------------------------------------------------------|-------------------------------------------------|--------------------------------------------------------------------------|------------------|---------------------------------------------------------------------------|
| Subject 10 | Pain in hip and calf<br>Unilateral                           | Dependant on level of activity                  | Occur at night when going to sleep<br>When running and playing foot-ball | Every second day |                                                                           |
| Subject 11 | Pain in the leg<br>Unilateral                                | Last three years                                | In activity/physical straining                                           | Every Day        | Heat<br>Decrease physical activity                                        |
| Subject 12 | Pain in shoulder and calf                                    | Always                                          | In activity/physical straining                                           | 2-3 times/week   | Injections and Botulinum toxins<br>Massage and foot creme                 |
| Subject 13 | Pain in calfs                                                | Always<br>Especially when growth spurt started  | After activity/physical straining                                        | Every Day        | Massage and muscle stretching<br>Rest for 2 days after strenuous activity |
| Subject 14 | Groin pain                                                   | Caregivers noticed when subject was a toddler   |                                                                          |                  | Massage and heat                                                          |
| Subject 15 | Stabbing pain in knee and adductors of the hip<br>Unilateral | During the last 4 months                        | Not activity related                                                     | Always           | Lying with pillow under leg                                               |
| Subject 16 | Both legs - accentuated in adductors and heel<br>Unilateral  | During the last 6 months                        | Activity related                                                         | Always           | Foot massage and muscle stretching<br>Lying with pillow under leg         |
| Subject 17 | Hip pain<br>Unilateral                                       | Always                                          | Post-activity related                                                    | 1-2 times/week   | Caregivers soothes child                                                  |
| Subject 18 | Hip pain<br>Bilateral                                        | For many years - accentuated the last 1-2 years | While sitting in chair                                                   | 1-2 times/week   | Massage and foot creme<br>repositioning in chair                          |
| Subject 19 | Hip pain<br>Unilateral                                       | For a year                                      | Changing position from lying to sitting                                  | Every Day        | Heat and distraction<br>Oral pain medicine with paracetamol               |
